1 **Comparison of the knockdown resistance locus (*kdr*) in *Anopheles stephensi*, *An.***  
2 ***arabiensis*, and *Culex pipiens s.l.* suggests differing mechanisms of pyrethroid resistance**  
3 **in east Ethiopia**

4 Tamar E. Carter<sup>1\*\*</sup>, Araya Gebresilassie<sup>2</sup>, Shantoy Hansel<sup>3</sup>, Lambodhar Damodaran<sup>4</sup>, Callum  
5 Montgomery<sup>3</sup>, Victoria Bonnell<sup>5</sup>, Karen Lopez<sup>3</sup>, Daniel Janies<sup>3\*</sup>, Solomon Yared<sup>6\*</sup>

6 1) Department of Biology, Baylor University, Waco, TX, USA

7 2) Department of Zoological Sciences, Addis Ababa University, Addis Ababa, Ethiopia

8 3) Department of Bioinformatics and Genomics, University of North Carolina at Charlotte,  
9 Charlotte, NC, USA

10 4) Institute of Bioinformatics, University of Georgia, Athens, GA, USA

11 5) Department of Molecular Biology and Biochemistry, Pennsylvania State University, State  
12 College, PA, USA

13 6) Department of Biology, Jigjiga University, Jigjiga, Ethiopia

14 \* Contributed equally

15 \*\*Corresponding author: [tamar\\_carter@baylor.edu](mailto:tamar_carter@baylor.edu)

16 TC: [tamar\\_carter@baylor.edu](mailto:tamar_carter@baylor.edu)

17 AG: [arayagh2006@yahoo.com](mailto:arayagh2006@yahoo.com)

18 SH: [shansel@uncc.edu](mailto:shansel@uncc.edu)

19 LD: [Lambodhar.Damodaran@uga.edu](mailto:Lambodhar.Damodaran@uga.edu)

20 CM: [cmontg24@uncc.edu](mailto:cmontg24@uncc.edu)

21 TB: [vab18@psu.edu](mailto:vab18@psu.edu)

22 KL: [klopez1@uncc.edu](mailto:klopez1@uncc.edu)

23 DJ: [djanies@uncc.edu](mailto:djanies@uncc.edu)

24 SY: [solyar2005@yahoo.com](mailto:solyar2005@yahoo.com)

25

26 **Abstract**

27           The recent detection of the malaria vector mosquito species *Anopheles stephensi*, which  
28 is typically restricted to South Asia and the Middle East, in the Horn of Africa emphasizes the  
29 importance of continued vector surveillance in the region. Previous reports of the absence of the  
30 knockdown resistance mutations (*kdr*) in the voltage-gated sodium channel (*vgsc*) in pyrethroid  
31 resistant *An. stephensi* emphasize the need for further investigation of the *kdr*-mediated  
32 resistance mutations in other mosquitoes of east Ethiopia. In this study, the knockdown resistance  
33 locus (*kdr*) in the voltage gated sodium channel (*vgsc*) was analyzed in *An. stephensi*, *An.*  
34 *arabiensis*, and *Culex pipiens s. l.* collected in east Ethiopia between 2016 and 2017. A portion of  
35 both *vgsc* was sequenced and amplified in *An. arabiensis* and *Cu. pipiens s.l.* and compared with  
36 *An. stephensi* sequences previously generated. All of *Cu. pipiens s.l.* (n = 42) and 71.6% of the  
37 *An. arabiensis* (n=67) carried *kdr* L1014F alleles known to confer pyrethroid resistance. Analysis  
38 of the downstream *kdr* intron in all three species revealed nucleotide diversity only in *An.*  
39 *stephensi* (s = 6, h = 3) previously shown to have no 1014 mutations. In addition, no evidence of  
40 non-neutral evolutionary processes was detected for *An. stephensi kdr* intron. Finally, no  
41 association between the *An. stephensi kdr* intron haplotypes and permethrin or DDT phenotypic  
42 resistance was detected. Overall, these results reveal evidence for differing degrees of selection  
43 at *kdr* that may suggest differing mechanisms of resistance across these species. While the  
44 presence of the L1014F mutation suggests target-site resistance mechanisms in *An. arabiensis*  
45 and *Cu. pipiens* in east Ethiopia, the lack of signatures for selection at *kdr* for resistant and non-  
46 resistant *An. stephensi* does not support a target-site mechanism of resistance based on the *kdr*  
47 locus in *An. stephensi*. This evidence of differing mechanisms of resistance across vector species  
48 can inform the design of future integrated strategies for vector control.

49 **Keywords:** malaria; vector-borne disease; insecticide resistance; DDT; selective sweep

50 **Synopsis**

51 Growing insecticide resistance hinders efforts to control the spread of vector-borne diseases. This  
52 is further complicated with the evidence of vectors moving into new regions as is the case with  
53 the newly detected *Anopheles stephensi* in the Horn of Africa. With this dynamic situation, it is  
54 important to evaluate how different local vectors develop resistance to insecticides to improve the  
55 implementation of insecticide-based strategies meant to target multiple vectors species. The  
56 authors analyzed a known insecticide resistance locus, *kdr*, in the *An. stephensi* and long-  
57 established *An. arabiensis* and *Culex pipiens s.l.* populations in east Ethiopia for evolutionary  
58 signatures of the common mechanism of resistance known as knockdown (target-site) resistance.  
59 The authors show that while *An. arabiensis* and *Culex pipiens s.l.* carry evolutionary signatures of  
60 the knockdown resistance mechanism, the *An. stephensi* do not. Additional comparisons of *kdr*  
61 genetic diversity and insecticide resistance status in the *An. stephensi* from Ethiopia further  
62 supports that the *kdr* and neighboring loci likely do not play a role in resistance in this *An.*  
63 *stephensi* population. These findings support the notion of that vectors in the same general region  
64 can have different modes for which they evolve resistance in east Ethiopia.

65

66

67

68

69

70

## 71 INTRODUCTION

72 Vector-borne diseases are major public health concern, of which malaria remains a  
73 leading threat with 228 million cases reported in 2018 (1). In Ethiopia, where both *Plasmodium*  
74 *vivax* and *P. falciparum* are prevalent and multiple *Anopheles* vector populations are present, 1.5  
75 million malaria cases were reported in 2017 (2). Malaria control in Ethiopia and the rest of the  
76 continent is now challenged with the recent finding of *An. stephensi*, a malaria vector, which is  
77 typically restricted to South Asia and the Middle East, in the Horn of Africa (3-6). With the recent  
78 evidence of *An. stephensi* demonstrated ability to transmit both major *Plasmodium* species (7),  
79 concerns are raised that this vector may contribute to the growing number of *P. vivax* cases being  
80 reported in Africa (Twohig et al. 2019). In addition, the number of dengue infections has recently  
81 increased in eastern Ethiopia (8, 9) and lymphatic filariasis in west Ethiopia (10). Given the  
82 multiple lines of evidence suggestive of vector-borne disease challenges, continued evaluation of  
83 mosquito vector populations in the region is needed to guide interventions.

84 Efforts to control vector populations in Ethiopia and abroad have relied heavily on the use  
85 of insecticides such as pyrethroids deployed through indoor residual spraying, insecticide-treated  
86 bed nets (ITNs), and long-lasting insecticidal nets (LLIN). As a result, widespread insecticide  
87 resistance has been reported across multiple vector species (11). In Culicidae, the main  
88 mechanisms of resistance to pyrethroids include target-site and metabolic-based resistance (12).  
89 Target-site resistance is based on altered neurological response to insecticides in mosquitoes  
90 and is caused by mutations in the voltage-gated sodium channel leading to knockdown resistance  
91 (*kdr*) [reviewed in (13)]. This mechanism is broadly studied and is widely reported across species  
92 of Culicidae including *Anopheles* spp. (12) and *Culex pipiens* s.l. (14). *Culex pipiens* s.l. is a  
93 complex of mosquito species that includes vectors for lymphatic filariasis and multiple arboviruses  
94 including the Rift Valley fever virus (RVFV) and West Nile virus. *Culex pipiens* complex also  
95 includes vectors for avian *Plasmodium*, filarioid helminths (*Dirofilaria* spp.), and Usutu virus.

96 In *Anopheles*, *kdr* involves the substitution of leucine (TTA) to phenylalanine (TTT) or to  
97 serine (TCA) at the 995 codon in the voltage gated sodium channel, commonly known as *kdr*  
98 L1014F and L1014S (15). A similar mutation is observed in the *vgsc* of *Culex* mosquitoes  
99 (GeneID:CPIJ007596) (16, 17). For metabolic resistance, the insecticide is degraded,  
100 sequestered or exported out of the cell before it can bind to its target (12). Metabolic resistance  
101 has not been linked to a single trackable genetic variant in most species. However, previous  
102 functional studies have found the over-expression of detoxification enzymes such as cytochrome  
103 P450s lead to metabolic resistance. (12, 18).

104 In Ethiopia, pyrethroid and DDT resistance has been reported in much of the northern and  
105 western portion of the country in the primary malaria vector *An. arabiensis*, (19-22). In *An.*  
106 *arabiensis*, both target-site and metabolic resistance to play a role in pyrethroid and DDT  
107 resistance. In eastern Ethiopia, a recent investigation revealed *An. stephensi* were resistant to  
108 pyrethroids however the L1014F and L1014S mutations were absent (23). *An. arabiensis*  
109 insecticide resistance in eastern Ethiopia has not been well characterized. Even more so, the  
110 status of insecticide resistance in *Cu. pipiens s.l.* (most likely *Cu. quinquefasciatus*) is unknown  
111 throughout most of the country. Understanding the molecular bases for resistance in these vector  
112 populations in Ethiopia is important for vector control planning. Effective vector control strategies  
113 are moving toward integrated approaches that take into account the ecology and behavior of  
114 multiple vector species (24). Knowing the variety of mechanisms of resistance to pyrethroids  
115 across vector species in a region can guide expectations of response to insecticides and the  
116 appropriate molecular markers for tracking insecticide resistance each species.

117 Genetic analysis of putative resistance loci across local vector populations, including those  
118 that spread malaria, can provide information on the range of mechanisms of resistance in a region.  
119 While *kdr* 1014 mutation frequencies provide preliminary evidence of target-site resistance to  
120 pyrethroids, analysis of the variation in neighboring intronic region provide information of the long-

121 term impact of pyrethroids on the evolution of the mosquito populations. Tests for neutrality, such  
122 as Tajima's D (25), can be used to evaluate the genetic diversity the intronic region to determine  
123 if the patterns differ from expectations under neutral evolution. It is expected that if the *kdr* locus  
124 was under selection due to pressure from the pyrethroids, then a selective sweep would cause  
125 low to no nucleotide diversity at the intron. (26, 27) . Thus, these analyses are helpful in clarifying  
126 the mechanisms of resistance, the current status of pyrethroid resistance, and predicting the risk  
127 of resistance emerging locally. Here we examine the diversity surrounding the *kdr* locus for  
128 evidence of selective pressure for insight into the mechanism of resistance in *An. stephensi*, *An.*  
129 *arabiensis*, and *Culex pipiens s. l.* collected in east Ethiopia.

## 130 **METHODS**

131 The study involved sequencing of a portion of the *vgsc* gene that contains loci that when mutated  
132 can confer resistance to pyrethroids. For *An. stephensi*, data came from sequences generated in  
133 a previous study (23) and generated in the present study. *An. arabiensis* and *Culex* sequence  
134 data was also generated in this study as detailed below.

### 135 **Sample collection and species identification**

136 *An. stephensi* analyzed in this were study collected from Kebri Dehar in 2016 as part the first  
137 detection of this species in Ethiopia (4). Specimens were larvae collected and lab-reared for  
138 testing for resistance to insect ides as previously detailed (23). *An. arabiensis* and *Culex*  
139 specimens collected in east Ethiopia in 2017 were included in this study. *An. arabiensis* species  
140 identification was based on morphological keys and molecular analysis of internal transcribed  
141 spacer 2 (*ITS2*) and cytochrome oxidase I (*COI*) loci as reported previously (28). *An. arabiensis*  
142 were collected using CDC light traps (John W. Hock, Gainesville, FL, USA) over four different  
143 collection times at two sites, Meki (east-central Ethiopia) and Harawe (northeast) in 2017. Harawe  
144 and Meki are about 350 km northwest and 600 km west of Kebri Dehar, respectively.

145 *Culex* specimens were collected using CDC light traps in Kebri Dehar in 2017. Morphological key  
146 and sequencing of *ITS2* locus were used for *Culex* identification using a previously published  
147 PCR protocol (4). All amplicons were cleaned using Exosap and sequenced using Sanger  
148 technology with ABI BigDye™ Terminator v3.1 chemistry (ThermoFisher, Santa Clara, CA)  
149 according to manufacturer recommendations and run on a 3130 Genetic Analyzer (Thermo  
150 Fisher, Santa Clara, CA). Sequences were cleaned and analyzed using CodonCode Aligner  
151 Program V. 6.0.2 (CodonCode Corporation, Centerville, MA). *ITS2* sequences from *Culex*  
152 specimen were submitted as queries to the National Center for Biotechnology Information's  
153 (NCBI) Basic Local Alignment Search Tool (BLAST) for species identification (29).

154

#### 155 **Amplification and sequencing of *kdr* loci**

156 Once species or species complex identification was complete, samples were processed. For *kdr*  
157 mutation analysis, polymerase chain reaction (PCR) was used to amplify the region of the *vgsc*  
158 gene that housed the homologous *kdr* 1014 and a neighboring downstream intron in all  
159 specimens. One leg from each mosquito specimen or extracted DNA was used as individual  
160 templates for PCR. Each species required a different PCR protocol. *An. stephensi kdr*  
161 amplification was completed according to Singh et al (30) with modifications as detailed in Yared  
162 et al (23). *An. arabiensis kdr* amplifications were completed according to Martinez-Torres et al  
163 (17). *Culex pipiens s.l kdr* amplifications were completed according to Chen et al (16). All PCR  
164 reactions were performed at 25µl total with 2X Promega Hot Start Master Mix (Promega  
165 Corporation, Madison, USA) and the primer conditions listed in Tab 1. All amplicons were cleaned  
166 using Exosap and sequenced using Sanger technology with ABI BigDye™ Terminator v3.1  
167 chemistry (ThermoFisher, Santa Clara, CA) according to manufacturer recommendations and run  
168 on a 3130 Genetic Analyzer (Thermo Fisher, Santa Clara, CA). The *An. stephensi kdr* sequences

169 were further analyzed for association with pyrethroid resistance. The Fisher-exact test was  
170 performed to determine whether *kdr* intron haplotypes were associated with pyrethroid resistance.

171 **Tab 1.** List of primer and conditions used for PCR amplification of portions of the voltage gated  
172 sodium channel gene.

| Assay                 | Primer      | Sequence              | Annealing           | Final Primer                |
|-----------------------|-------------|-----------------------|---------------------|-----------------------------|
|                       |             |                       | Temperature<br>(°C) | Concentration<br>( $\mu$ M) |
| <i>An. stephensi</i>  | <i>KdrF</i> | GGACCAYGATTTGCCAAGAT  | 50                  | 1.25                        |
|                       | VGS_1R      | CGAAATTGGACAAAAGCAAGG | 50                  | 1.25                        |
| <i>An. arabiensis</i> | <i>Agd1</i> | ATAGATTCCCCGACCATG    | 52                  | 1.25                        |
|                       | <i>Agd2</i> | AGACAAGGATGATGAACC    | 52                  | 1.25                        |
| <i>Culex</i>          | <i>Cpp1</i> | CCTGCCACGGTGGA ACTTC  | 58                  | 1                           |
|                       | <i>Cpp2</i> | GGACAAAAGCAAGGCTAAGAA | 58                  | 1                           |

173

#### 174 **Sequence analysis**

175 Sequences were submitted as queries to the National Center for Biotechnology  
176 Information's (NCBI) Basic Local Alignment Search Tool (BLAST) to confirm correct loci were  
177 amplified. Sequences were then aligned by species or species complex to identify *kdr* mutations.  
178 The *kdr* allele and genotype frequencies were then calculated and compared across species.  
179 *Aedes aegypti* *vgsc* sequence taken from NCBI was used as an outgroup.

180 We are interested in comparing the level of diversity in the neighboring intron downstream  
181 of the 1014 mutations in *Culex* spp. and *An. arabiensis* to *An. stephensi*. The cross-species  
182 comparison provides evidence for past insecticide use in east Ethiopia and the mechanisms of  
183 resistance across species. In addition to the sequences generated in this study, we included



184 sequences from resistant and non-resistant *An. stephensi* analyzed in a previous study on  
185 insecticide resistance in *An. stephensi* (23). We calculated the number of segregating sites,  
186 nucleotide diversity, the estimated number of haplotypes, and haplotype diversity using the  
187 program DNAsp v5 (31). Haplotypes were reconstructed using Phase 2.1 (32), HAPAR, and  
188 fastPHASE (33) algorithms in DNAsp. The neighboring downstream intron was also tested for  
189 neutrality using Tajima's D (25), Fu's F (34), and Fu and Li's D\* and F\* tests (35).

190 We also performed phylogenetic analysis of the 1014+intron sequences. Alignments were  
191 created with MAFFT version 7 (36) and ragged ends were trimmed using Mesquite 3.51 (37).  
192 Phylogenetic relationships using the sequenced portion of *vgsc* were inferred using RAxML (38)  
193 which is based on a maximum likelihood (ML) approach. The GTRGAMMA option that uses GTR  
194 model of nucleotide substitution with gamma model of rate of heterogeneity was applied. A  
195 thousand replicates were performed with the strategy searching for the heuristically-best-scoring  
196 tree and bootstrap analysis in one run. Best scoring trees under ML with bootstrap values from  
197 RAxML were viewed and rooted under the outgroup criterion (*Aedes aegypti*) in FigTree (39).

### 198 ***An. stephensi* *kdr* Intron and resistance phenotype association analysis**

199 Comparison of phenotype and haplotype data can provide additional clarification of the  
200 role of the *vgsc* in pyrethroid or DDT resistance in *An. stephensi*. Intron haplotypes may be linked  
201 to proximal mutations not covered in the regions sequenced that confer resistance. WHO  
202 bioassay insecticide resistance data were previously generated for the *An. stephensi* included in  
203 this study (23). We tested the association between the *kdr* intron haplotypes and resistance  
204 status (resistant vs. non-resistant) based on permethrin or DDT WHO bioassay results. Fisher  
205 Exact test with  $\alpha = 0.05$  was used to evaluate the association.

## 206 **RESULTS**

207 To provide greater ecological context to the mechanism behind insecticide resistance in  
208 *An. stephensi*, we also examined the frequency of the insecticide resistance mutations in other  
209 Culicidae species collected in eastern Ethiopia, including *Cu. pipiens s.l.* and *An. arabiensis*. Prior  
210 to insecticide resistance genotyping, all *Culex* ITS2 sequences were analyzed to identify species.  
211 All sequences were identical and had equivalent high matching scores for two members of the  
212 *Cu. pipiens* complex: *Cu. quinquefasciatus* and *Cu. pipiens pipiens*. Because we could not  
213 determine which of these two species these specimens belong to, we will refer to these specimens  
214 by its broader taxonomic classification, *Cu. pipiens s. l.* (ie *Cu. pipiens* complex) in this study. *An.*  
215 *arabiensis* species identification was detailed in previous study (28). In total, 10, 33, and 24 *An.*  
216 *arabiensis* were collected in Harawe in November 2016, Harawe in July/August 2017, and Meki  
217 in July 2017 collections, respectively.

#### 218 *Kdr analysis*

219 The *kdr* fragments were sequenced for *An. stephensi*, *Cu. pipiens s.l.*, and *An. arabiensis*.  
220 The sequencing resulted in 184, 452, and 290 base pair fragments for *An. stephensi*, *Cu. pipiens*  
221 *s. l.* and *An. arabiensis*, respectively. The percent of each *kdr* genotype observed by species is  
222 shown in Fig 1. A total of 131 *An. stephensi* were analyzed in this study, including 80 newly  
223 reported sequences. None of the *An. stephensi* analyzed in this study carried a mutation at the  
224 *kdr* 1014. All 42 *Cu. pipiens s.l.* specimens collected at the same site carried *kdr* L1014F  
225 mutations as homozygous. Of the 67 *An. arabiensis*, 71.6% carried the *kdr* L1014F mutation  
226 (heterozygous and homozygous). The allele frequency of L1014F mutation varied across *An.*  
227 *arabiensis* collections, where the highest frequency was observed in Harawe in November 2016  
228 (100%). L1014F allele frequency for Harawe July/August 2017 and in Meki July 2017 collections  
229 were 86.4% and 10%, respectively. None of the *Cu. pipiens s.l.* or *An. arabiensis* collected at  
230 these localities carried the L1014S allele.

231

232

233

234 **Fig. 1** Frequency of *kdr* 1014 genotypes in *An. stephensi*, *Culex pipiens s.l.*, and *An. arabiensis*  
235 collections.

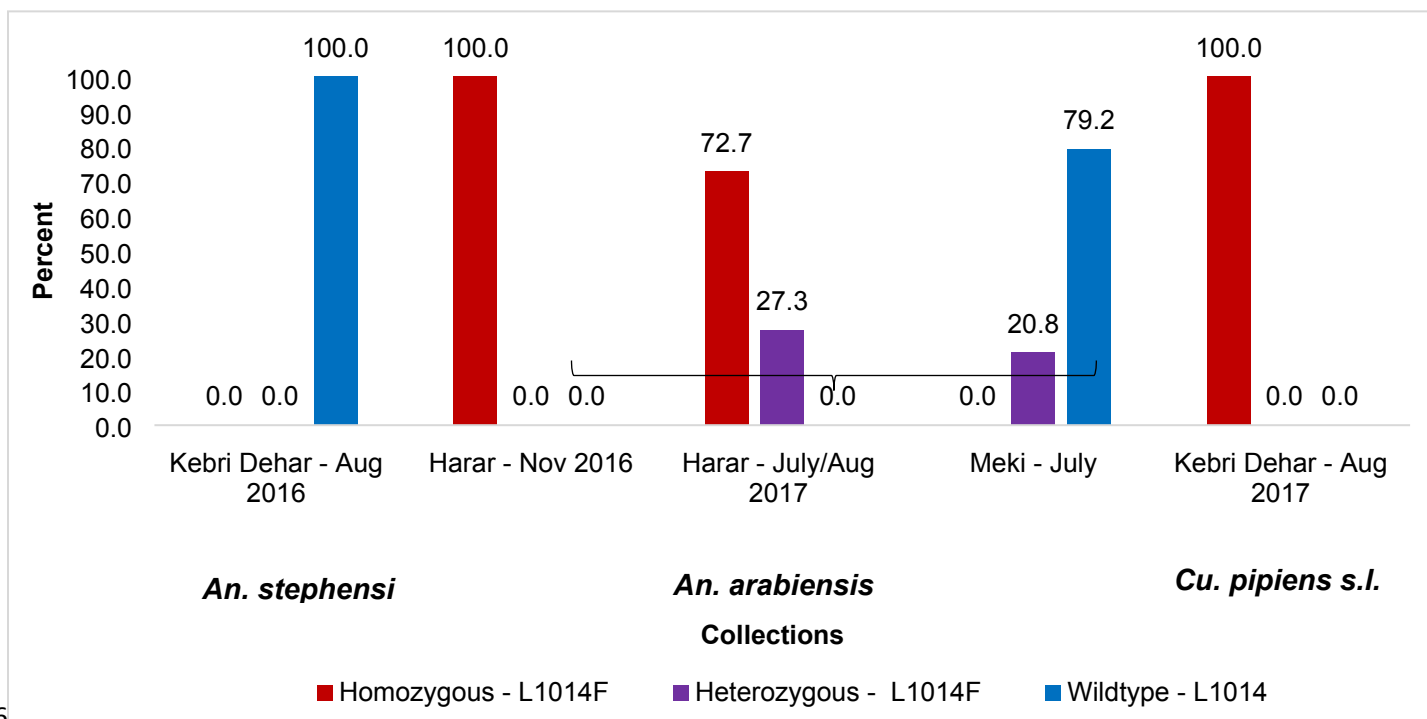

236

237

238 A portion of the neighboring downstream intron for each species was analyzed to evaluate  
239 the level of diversity (Fig 2). Intron analysis revealed no polymorphisms for either *Cu. pipiens* or  
240 *An. arabiensis* (for both L1014F and L1014 wild type specimens). Of the 131 *An. stephensi*  
241 specimens from Kebri Dehar examined for *kdr* mutations, six segregating sites were detected,  
242 and three haplotypes predicted. Genetic diversity estimates are reported in Tab 2.

243

244

245

246

247

248 **Fig. 2** Summary of *kdr* haplotypes across three Culicidae species in east Ethiopia. Solid lines  
 249 depict the exon housing the *kdr* locus and dotted lines depict the downstream intron. Green  
 250 square indicates the presence of the *kdr* L1014F. Triangles denote single nucleotide  
 251 polymorphisms (SNPs) found in the intron relative to the most prevalent intron haplotype.

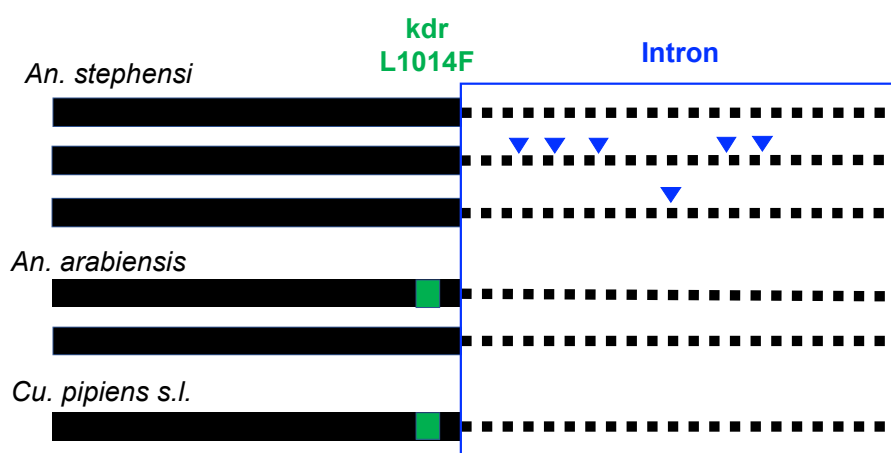

252

253

254 **Tab 2.** Genetic diversity estimates for *kdr* neighboring downstream intron in the *vgsc* for *An.*  
 255 *stephensi*, *An. arabiensis*, and *Cu. pipiens s.l.*, where n = number of sequences used, S =  
 256 number of polymorphic (ie segregating) sites, K = average number of pairwise nucleotide  
 257 differences, Pi = nucleotide diversity, h = number of Haplotypes, Hd = haplotype diversity.

| Species                 | n   | S | k     | Pi      | h | Hd    |
|-------------------------|-----|---|-------|---------|---|-------|
| <i>An. stephensi</i>    | 262 | 6 | 0.996 | 0.00545 | 3 | 0.225 |
| <i>An. arabiensis</i>   | 134 | 0 | 0     | 0       | 1 | 0     |
| <i>Cu. pipiens s.l.</i> | 84  | 0 | 0     | 0       | 1 | 0     |

258

259 The phylogenetic analysis of the *kdr* and downstream intron sequences reveals significant  
260 differentiation between species (Fig 3, bootstrap > 93). Alignments revealed that the region  
261 surrounding the *kdr* locus is conserved while the intron region is highly divergent across species  
262 (Supplemental File 1 and 2).

263 **Fig. 3** Maximum-likelihood tree of *An. stephensi*, *An. arabiensis*, and *Cu. pipiens s.l. vgsc*  
264 sequences from east Ethiopia. Analysis is based on a portion of the *vgsc* containing *kdr* 1014  
265 and portions of the downstream intron (185 bp) with *Ae. aegypti* outgroup. Final ML  
266 Optimization Likelihood: -664.487198.

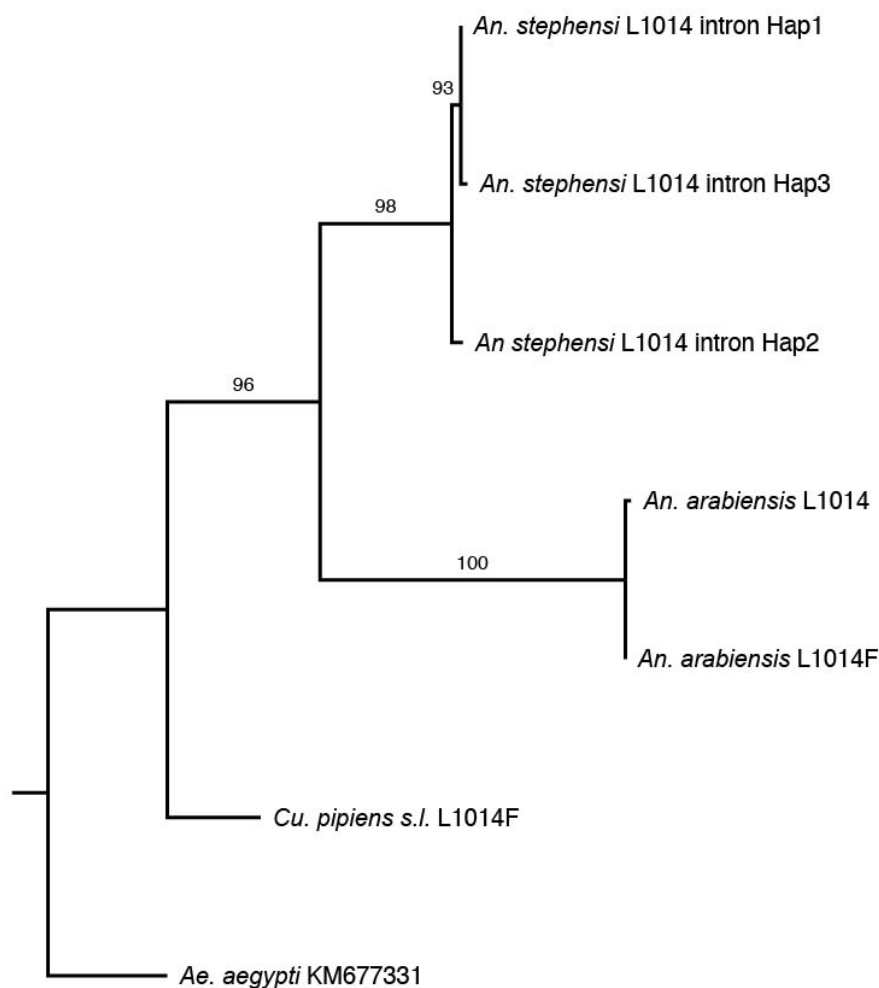

268

269 To further evaluate the potential functional significance of the *kdr* locus in *An. stephensi*  
270 based on evidence of positive selection, we conducted tests for neutrality at the *An. stephensi kdr*  
271 intron in using Tajima's D, Fu's F, Fu and Li's D, and Fu and Li's F (Tab 3). No evidence of non-  
272 neutral processes was detected in *An. stephensi* for the *kdr* locus. The absence of variation in  
273 *An. arabiensis* and *Cu. pipiens* s.l. *kdr* introns precluded tests for neutrality.

274 **Tab 3.** Tests for neutrality for downstream *kdr* intron for *An. stephensi*. All p-value > 0.10.

| Test          | Estimate |
|---------------|----------|
| n             | 258      |
| Tajima's D    | 0.03839  |
| Fu's F        | 3.556    |
| Fu and Li's D | 1.04354  |
| Fu and Li's F | 0.82943  |

275

276 *Comparing An. stephensi kdr intron haplotype vs. phenotype data*

277 To further elucidate the significance of the *kdr* locus for insecticide resistance in *An.*  
278 *stephensi*, we tested the association between the haplotypes that were observed in the *kdr* intron  
279 and the phenotypic resistance to either the pyrethroid insecticide permethrin or DDT [phenotype  
280 data from (23)]. While the intron variation itself is likely of no functional significance, it may be  
281 linked to upstream or downstream variants in coding regions of the *vgsc*. The *kdr* locus was  
282 sequenced in 88 *An. stephensi* that were tested for permethrin or DDT sensitivity, previously (Tab  
283 4). In this analysis, we focused on the *kdr* intron haplotypes with the highest frequency,  
284 designated Hap1 and Hap2. Specimens that had one copy of the rarer third haplotype Hap3 (n=4)

285 were excluded from the analysis. The remaining samples were divided based on whether they  
286 had at least one copy of the *kdr*H2 haplotype (n=24, 27.3%) or not (n=64, 72.7%). Of the 84 *An.*  
287 *stephensi* used of this analysis, 55 (62.5%) were classified as pyrethroid sensitive and 33 (37.5%)  
288 were classified as resistant. The results of the Fisher exact test revealed no significant difference  
289 in frequency of insecticide resistance between carriers of the *kdr* intron Hap2 carriers and non-  
290 carriers (two-sided prob p-value = 0.8052).

291

292 **Tab 4.** Comparison of *An. stephensi kdr* intron haplotypes and insecticide resistance status. No  
293 *An. stephensi* carried two copies of Hap3 (ie Hap3/Hap3).

| Insecticide | Status    | N  | <i>kdr</i> Intron Haplotypes |           |           |           |           |
|-------------|-----------|----|------------------------------|-----------|-----------|-----------|-----------|
|             |           |    | Hap1/Hap1                    | Hap1/Hap2 | Hap1/Hap3 | Hap2/Hap3 | Hap2/Hap2 |
| Permethrin  | Resistant | 17 | 13                           | 3         | 0         | 0         | 1         |
|             | Sensitive | 41 | 26                           | 12        | 2         | 0         | 1         |
| DDT         | Resistant | 16 | 11                           | 3         | 1         | 0         | 1         |
|             | Sensitive | 14 | 11                           | 2         | 0         | 1         | 0         |
| Combined    | Resistant | 33 | 24                           | 6         | 1         | 0         | 2         |
|             | Sensitive | 55 | 37                           | 14        | 2         | 1         | 1         |
| Total       |           | 88 | 61                           | 20        | 3         | 1         | 3         |

294

295

## 296 DISCUSSION

297 Our results reveal key differences between insecticide resistance loci across east  
298 Ethiopian Culicidae. In particular, the *kdr* L1014F mutation was not observed consistently across  
299 the species included in this study. The difference in the genetic diversity at the *kdr* loci observed

300 between *Cu. pipiens complex* specimens and *An. stephensi*, both collected at the same location  
301 and likely exposed to similar degrees of insecticides leading up to their detection and collection,  
302 was an unexpected finding. Unlike the *An. stephensi*, all the *Culex pipiens s.l.* carried the L1014F  
303 mutation. Similarly, *An. arabiensis* sample sets had a high frequency of L1014F mutations,  
304 supporting the relevance of *kdr* based target-site mechanism of resistance for those species.

305 We also observed differences in the nucleotide diversity of the neighboring intronic region  
306 of the three species. While *An. stephensi* exhibited multiple segregating sites and resultant  
307 haplotypes, only a single intronic haplotype is observed for *An. arabiensis* and *Cu. pipiens s.l.*  
308 Although neutrality tests could not be performed for these samples sets due to the absence of  
309 nucleotide variation, the absence of variation itself could be evidence of a hard-selective sweep,  
310 indicative of a locus under selective pressure. Tests for neutrality of the *An. stephensi* reveals no  
311 evidence of non-neutral processes, such as positive selection, shaping that variation. Taken  
312 together, the high frequency of the L1014F mutation in *Cu. pipiens* and *An. arabiensis* and  
313 absence of the variation in the neighboring intron supports the notion that these east Ethiopian  
314 mosquitoes have undergone selective pressure on the *vgsc* from pyrethroids that likely would  
315 lead to target-site resistance. However, the absence of 1014 mutations and presence of intronic  
316 variation in pyrethroid resistant *An. stephensi* suggest the opposite and point to the possibility of  
317 different mechanisms of resistance across the eastern Ethiopian Culicidae. Additional analysis of  
318 the permethrin and DDT sensitivity phenotype and *kdr* intron haplotype data reveal no significant  
319 association with the intron and insecticide resistance status. This further supports the notion that  
320 the *kdr* locus and proximal loci in the *vgsc* likely play no role in pyrethroid resistance in *An.*  
321 *stephensi* in Ethiopia and other loci associated with metabolic resistance or other mechanisms of  
322 resistance may be more relevant. Analysis of the full *vgsc* gene sequence is need and ongoing  
323 to confirm the role of this gene in *An. stephensi* insecticide resistance.



324           Interestingly, when we compare the intronic regions of the *An. arabiensis* that carried the  
325 L1014F mutation to those that did not, the same signature of lack variation of in the intron (i.e. a  
326 single haplotype) was observed. The mosquitoes that carried the once advantageous allele may  
327 suffer fitness costs in the absence of the selective pressure, which would result in a rebound of  
328 the wild-type allele at that locus. However, the intronic haplotype associated with resistance  
329 remains in the population. These findings underline the limitations of relying solely on *kdr* 1014  
330 allele frequencies for evidence of the degree of impact of selective pressure on the mosquito  
331 population and the determination of mechanism of resistance in a particular species. Broader  
332 sequence analysis including neighboring introns can provide context of the historical impact of  
333 insecticide resistance.

334           Several limitations to these studies should be considered. The *An. stephensi* were  
335 collected as larvae and pupae and the *An. arabiensis* and *Cu. pipiens s.l.* were collected as wild-  
336 caught adults. This method of collection may pose a concern that the immature specimen set  
337 would not reflect the natural diversity of the wild-caught adult population. Concerns with clonality  
338 however are lowered when considering the level of diversity observed at the *An. stephensi kdr*  
339 locus and at the *ace-1R* locus (3 haplotypes detected; data not shown). In addition, while *An.*  
340 *stephensi* phenotypic resistance has been reported, *An. arabiensis* and *Cu. pipiens s.l.*  
341 phenotypic resistance data is still lacking for east Ethiopia. Though pyrethroid resistance in *An.*  
342 *arabiensis* and *Cu. pipiens s.l.* is widely reported in Africa, complementary bioassay and genetic  
343 data can confirm the molecular-based findings observed in this study.

344           In conclusion, the different patterns of diversity at the *kdr* loci across species does support  
345 the potential for differing mechanisms of resistance across Culicidae in east Ethiopia. Both *An.*  
346 *arabiensis* and *Cu. pipiens* sample sets revealed notable L1014F allele frequencies that confer  
347 target-site resistance and absence of intron variation that tells of selective pressure on that locus  
348 in those species. Additional investigations are needed to determine the mechanisms and genetic

349 basis of pyrethroid resistance (metabolic or another undiscovered mechanism) in *An. stephensi*.  
350 These finding emphasize the need for careful consideration of molecular approaches used to  
351 evaluate insecticide resistance status across multiple species and will inform the development  
352 and future implementation of novel integrated vector control strategies.

### 353 **Abbreviations**

354 **BLAST:** Basic Local Alignment Search Tool

355 **DNA:** Deoxyribonucleic Acid

356 **FMOH:** Federal Ministry of Health

357 **ITS2:** Internal transcribed spacer 2 region

358 **NCBI:** National Center of Biotechnology Information

359 **PCR:** Polymerase chain reaction

360 **KDR:** knockdown resistance

361 **VGSC:** voltage-gated sodium channel

362 **COI:** Cytochrome c oxidase subunit 1 gene

363 **CDC:** Centers for Disease Control and Prevention

364 **WHO:** World Health Organization

365

### 366 **Acknowledgements**

367 Our gratitude goes to Mr. Negib Abdi and Habtamu Atlaw for their facilitating financial and  
368 arranging the car for the field work. We would also like to thank Mr. Geleta Bekele for his  
369 technical support in rearing mosquito at field laboratory. We acknowledge the support of various

370 entities of the University of North Carolina at Charlotte including: the Department of  
371 Bioinformatics and Genomics of the College of Computing and Informatics and the Department  
372 of Biological Sciences of the College of Literature Science and the Arts. We are grateful for the  
373 support of the Belk Family.

#### 374 **References**

- 375 1. Organization WH. World malaria report 2019. 2019.
- 376 2. Organisation WH. World malaria report 2018. WHO Geneva; 2018.
- 377 3. Balkew M, Mumba P, Dengela D, Yohannes G, Getachew D, Yared S, et al. Geographical  
378 distribution of *Anopheles stephensi* in eastern Ethiopia. Parasit Vectors. 2020;13(1):35.
- 379 4. Carter TE, Yared S, Gebresilassie A, Bonnell V, Damodaran L, Lopez K, et al. First  
380 detection of *Anopheles stephensi* Liston, 1901 (Diptera: culicidae) in Ethiopia using  
381 molecular and morphological approaches. Acta Trop. 2018;188:180-6.
- 382 5. Faulde MK, Rueda LM, Khaireh BA. First record of the Asian malaria vector *Anopheles*  
383 *stephensi* and its possible role in the resurgence of malaria in Djibouti, Horn of Africa. Acta  
384 Trop. 2014;139:39-43.
- 385 6. Seyfarth M, Khaireh BA, Abdi AA, Bouh SM, Faulde MK. Five years following first detection  
386 of *Anopheles stephensi* (Diptera: Culicidae) in Djibouti, Horn of Africa: populations  
387 established-malaria emerging. Parasitol Res. 2019;118(3):725-32.
- 388 7. Amenu TA, Teka H, Esayas E, Messenger LA, Chali W, Meerstein-Kessel L, et al.  
389 *Anopheles stephensi* as an emerging malaria vector in the Horn of Africa with high  
390 susceptibility to Ethiopian Plasmodium vivax and Plasmodium falciparum isolates.  
391 bioRxiv. 2020.
- 392 8. Degife LH, Worku Y, Belay D, Bekele A, Hailemariam Z. Factors associated with dengue  
393 fever outbreak in Dire Dawa administration city, October, 2015, Ethiopia - case control  
394 study. BMC Public Health. 2019;19(1):650.

- 395 9. Ahmed YM SA. Epidemiology of dengue fever in Ethiopian Somali region: retrospective  
396 health facility based study. Cent Afr J Public Health. 2016 2(51).
- 397 10. Kebede B, Martindale S, Mengistu B, Kebede B, Mengiste A, F HK, et al. Integrated  
398 morbidity mapping of lymphatic filariasis and podoconiosis cases in 20 co-endemic  
399 districts of Ethiopia. PLoS Negl Trop Dis. 2018;12(7):e0006491.
- 400 11. Ranson H, Lissenden N. Insecticide Resistance in African *Anopheles* Mosquitoes: A  
401 Worsening Situation that Needs Urgent Action to Maintain Malaria Control. Trends  
402 Parasitol. 2016;32(3):187-96.
- 403 12. Ranson H, N'Guessan R, Lines J, Moiroux N, Nkuni Z, Corbel V. Pyrethroid resistance in  
404 African anopheline mosquitoes: what are the implications for malaria control? Trends  
405 Parasitol. 2011;27(2):91-8.
- 406 13. Davies TG, Field LM, Usherwood PN, Williamson MS. A comparative study of voltage-  
407 gated sodium channels in the Insecta: implications for pyrethroid resistance in Anopheline  
408 and other Neopteran species. Insect Mol Biol. 2007;16(3):361-75.
- 409 14. Scott JG, Yoshimizu MH, Kasai S. Pyrethroid resistance in *Culex pipiens* mosquitoes.  
410 Pestic Biochem Physiol. 2015;120:68-76.
- 411 15. Ranson H, Jensen B, Vulule JM, Wang X, Hemingway J, Collins FH. Identification of a  
412 point mutation in the voltage-gated sodium channel gene of Kenyan *Anopheles gambiae*  
413 associated with resistance to DDT and pyrethroids. Insect Molecular Biology.  
414 2000;9(5):491-7.
- 415 16. Chen L, Zhong D, Zhang D, Shi L, Zhou G, Gong M, et al. Molecular ecology of pyrethroid  
416 knockdown resistance in *Culex pipiens pallens* mosquitoes. PLoS One.  
417 2010;5(7):e11681.
- 418 17. Martinez-Torres D, Chevillon C, Brun-Barale A, Berge JB, Pasteur N, Pauron D. Voltage-  
419 dependent Na<sup>+</sup> channels in pyrethroid-resistant *Culex pipiens* L mosquitoes. Pestic Sci.  
420 1999;55(10):1012-20.

- 421 18. David JP, Ismail HM, Chandor-Proust A, Paine MJ. Role of cytochrome P450s in  
422 insecticide resistance: impact on the control of mosquito-borne diseases and use of  
423 insecticides on Earth. *Philos Trans R Soc Lond B Biol Sci.* 2013;368(1612):20120429.
- 424 19. Alemayehu E, Asale A, Eba K, Getahun K, Tushune K, Bryon A, et al. Mapping insecticide  
425 resistance and characterization of resistance mechanisms in *Anopheles arabiensis*  
426 (Diptera: Culicidae) in Ethiopia. *Parasit Vectors.* 2017;10(1):407.
- 427 20. Asale A, Getachew Y, Hailesilassie W, Speybroeck N, Duchateau L, Yewhalaw D.  
428 Evaluation of the efficacy of DDT indoor residual spraying and long-lasting insecticidal  
429 nets against insecticide resistant populations of *Anopheles arabiensis* Patton (Diptera:  
430 Culicidae) from Ethiopia using experimental huts. *Parasit Vectors.* 2014;7:131.
- 431 21. Balkew M, Ibrahim M, Koekemoer LL, Brooke BD, Engers H, Aseffa A, et al. Insecticide  
432 resistance in *Anopheles arabiensis* (Diptera: Culicidae) from villages in central, northern  
433 and south west Ethiopia and detection of kdr mutation. *Parasit Vectors.* 2010;3(1):40.
- 434 22. Yewhalaw D, Van Bortel W, Denis L, Coosemans M, Duchateau L, Speybroeck N. First  
435 Evidence of High Knockdown Resistance Frequency in *Anopheles arabiensis* (Diptera:  
436 Culicidae) from Ethiopia. *Am J Trop Med Hyg.* 2010;83(1):122-5.
- 437 23. Solomon Yared AG, Lambodhar Damodaran, Victoria Bonnell, Karen Lopez, Daniel  
438 Janies, Tamar Carter. Insecticide Resistance in *Anopheles stephensi* in Somali Region,  
439 Eastern Ethiopia. 2020.
- 440 24. Golding N, Wilson AL, Moyes CL, Cano J, Pigott DM, Velayudhan R, et al. Integrating  
441 vector control across diseases. *BMC Med.* 2015;13:249.
- 442 25. Tajima F. Statistical method for testing the neutral mutation hypothesis by DNA  
443 polymorphism. *Genetics.* 1989;123(3):585-95.
- 444 26. Chang X, Zhong D, Lo E, Fang Q, Bonizzoni M, Wang X, et al. Landscape genetic  
445 structure and evolutionary genetics of insecticide resistance gene mutations in *Anopheles*  
446 *sinensis*. *Parasit Vectors.* 2016;9:228.

- 447 27. Weill M, Chandre F, Brengues C, Manguin S, Akogbeto M, Pasteur N, et al. The kdr  
448 mutation occurs in the Mopti form of *Anopheles gambiae* s.s. through introgression. Insect  
449 Molecular Biology. 2000;9(5):451-5.
- 450 28. Carter TE, Yared S, Hansel S, Lopez K, Janies D. Sequence-based identification of  
451 *Anopheles* species in eastern Ethiopia. Malar J. 2019;18(1):135.
- 452 29. Madden T. The BLAST Sequence Analysis Tool. 2002. In: The NCBI Handbook [Internet].  
453 Bethesda, MD: National Center for Biotechnology Information. Available from:  
454 <http://www.ncbi.nlm.nih.gov/books/NBK21097/>.
- 455 30. Singh OP, Dykes CL, Lather M, Agrawal OP, Adak T. Knockdown resistance (kdr)-like  
456 mutations in the voltage-gated sodium channel of a malaria vector *Anopheles stephensi*  
457 and PCR assays for their detection. Malaria journal. 2011;10(1):59.
- 458 31. Rozas J, Sanchez-DelBarrio JC, Messeguer X, Rozas R. DnaSP, DNA polymorphism  
459 analyses by the coalescent and other methods. Bioinformatics. 2003;19(18):2496-7.
- 460 32. Stephens M, Smith NJ, Donnelly P. A new statistical method for haplotype reconstruction  
461 from population data. Am J Hum Genet. 2001;68(4):978-89.
- 462 33. Scheet P, Stephens M. A fast and flexible statistical model for large-scale population  
463 genotype data: applications to inferring missing genotypes and haplotypic phase. Am J  
464 Hum Genet. 2006;78(4):629-44.
- 465 34. Fu YX. Statistical tests of neutrality of mutations against population growth, hitchhiking  
466 and background selection. Genetics. 1997;147(2):915-25.
- 467 35. Fu YX, Li WH. Statistical tests of neutrality of mutations. Genetics. 1993;133(3):693-709.
- 468 36. Folmer O, Black M, Hoeh W, Lutz R, Vrijenhoek R. DNA primers for amplification of  
469 mitochondrial cytochrome c oxidase subunit I from diverse metazoan invertebrates. Mol  
470 Mar Biol Biotechnol. 1994;3(5):294-9.
- 471 37. Maddison WPaM, D. R. Mesquite: a modular system for evolutionary analysis. 3.51  
472 ed2018.

473 38. Stamatakis A. RAxML version 8: a tool for phylogenetic analysis and post-analysis of large  
474 phylogenies. *Bioinformatics*. 2014;30(9):1312-3.

475 39. A. R. FigTree, A Graphical Viewer of Phylogenetic Trees. 2007.

476

## 477 **Supporting Information**

478 S1 Figure. Image of alignment used for phylogenetic analysis.

479 S2 Table. Text file of alignment used for phylogenetic analysis.

480
